# Supplementary material
Source: publisher site journal article supplement (https://www.dovepress.com/article/468537)
Supplement: Supplementary file 1 [file get_supplementary_file.php]

**Supplementary Table 1 Survival analyses results of systemic inflammation parameters**

| Characteristics | Category | N | Progression-free survival (PFS)  Median PFS (95% CI) p-value | | Overall survival (OS)  Median OS (95% CI) p-value | |
| --- | --- | --- | --- | --- | --- | --- |
| PLR | High | 96 | 14.6 (11.63-) | 0.205 | - (36.87-) | 0.002 |
|  | Low | 13 | 11.1 (3.43-) |  | 26.1 (5.27-) |  |
| NLR | High | 16 | 7.1 (3.9-) | <0.001 | 23.8 (11.3-) | 0.043 |
|  | Low | 93 | 20.6 (12.7-) |  | - (26.1) |  |
| MLR | High | 19 | 8.77 (3.93-) | 0.086 | 23.8 (11.3-) | 0.066 |
|  | Low | 90 | 14.57 (12.07-) |  | 36.9 (26.1-) |  |
| SII | High | 23 | 12.0 (7.0-) | 0.281 | 23.8 (12.7-) | 0.146 |
|  | Low | 86 | 16.7 (11.6-) |  | 36.9 (26.1-) |  |
| PIV | High | 12 | 7.98 (3.0-) | 0.027 | 11.3 (6.93-) | <0.001 |
|  | Low | 97 | 16.7 (12.1-) |  | - (34.07-) |  |
| PILE (n=87) | 0 | 13 | 23.0 (23.3-) | <0.001 | - (26.1) | <0.001 |
|  | 1 | 32 | - (14.57) |  | - (24.5) |  |
|  | 2 | 34 | 7.03 (4.87-) |  | 25.6 (20.6-) |  |
|  | 3 | 8 | 9.95 (3.9-) |  | 12.7 (7.2-) |  |
| PILE (n=87) | High | 42 | 7.13 (4.87-) | <0.001 | 25.6 (15.6-) | 0.008 |
|  | Low | 45 | 26.13 (23.30-) |  | - (26.1) |  |

**Supplementary Table 2 Univariate and multivariate Cox analyses of overall survival in the PILE cohort**

| Characteristics  （N=87） | Category | Overall survival  Univariate analysis Multivariate analysis  HR (95% CI) p-value HR (95% CI) p-value | | | |
| --- | --- | --- | --- | --- | --- |
| Age | >=65/<65 | 1.415 (0.644-3.106) | 0.387 |  |  |
| Gender | Male/Female | 2.165 (0.955-4.911) | 0.065 |  |  |
| Biopsy type | Stereotactic biopsy/Surgical resection or Open biopsy | 0.393 (0.133-1.157) | 0.090 |  |  |
| Hans | Non-GCB/GCB | 0.780 (0.323-1.881) | 0.580 |  |  |
| Tumor Size | >=5cm/<5cm | 1.324 (0.551-3.184) | 0.531 |  |  |
| Deep Lesions | Present/Absent | 0.955 (0.397-2.296) | 0.918 |  |  |
| Number of lesions | Multiple/Single | 0.884 (0.401-1.951) | 0.208 |  |  |
| KPS | >=70/<70 | 0.177 (0.079-0.392) | <0.001 | 0.245 (0.103-0.583) | 0.001 |
| ECOG | >=2/<2 | 2.471 (0.844-7.232) | 0.099 |  |  |
| MSKCC | Intermediate/Low | 1.068 (0.238-4.785) | 0.931 |  |  |
|  | High/Low | 4.430 (0.970-20.224) | 0.055 |  |  |
| PLR | High/Low | 0.315 (0.125-0.796) | 0.015 | 0.177 (0.062-0.504) | 0.001 |
| NLR | High/Low | 2.691(0.975-7.425) | 0.056 |  |  |
| MLR | High/Low | 2.227 (0.830-5.976) | 0.112 |  |  |
| SII | High/Low | 1.796 (0.737-4.381) | 0.198 |  |  |
| PIV | High/Low | 5.394 (1.949-14.920) | 0.001 | 0.075 (0.650-6.623) | 0.218 |
| PILE | High/Low | 3.091 (1.290-7.411) | 0.011 | 3.036 (1.122-8.217) | 0.029 |

**Supplementary Table 3 Univariate and multivariate Cox analyses of progression-free survival in the PILE cohort**

| Characteristics  （N=87） | Category | Progression-free survival  Univariate analysis Multivariate analysis  HR (95% CI) p-value HR (95% CI) p-value | | | |
| --- | --- | --- | --- | --- | --- |
| Age | >=65/<65 | 0.887 (0.495-1.587) | 0.685 |  |  |
| Gender | Male/Female | 1.264 (0.717-2.229) | 0.418 |  |  |
| Biopsy type | Stereotactic biopsy/Surgical resection or Open biopsy | 0.627 (0.224-1.759) | 0.376 |  |  |
| Hans | Non-GCB/GCB | 1.198 (0.610-2.353) | 0.599 |  |  |
| Tumor Size | >=5cm/<5cm | 1.184 (0.615-2.282) | 0.613 |  |  |
| Deep Lesions | Present/Absent | 1.104 (0.573-2.129) | 0.768 |  |  |
| Number of lesions | Multiple/Single | 0.823 (0.465-1.459) | 0.505 |  |  |
| KPS | >=70/<70 | 0.515 (0.279-0.951) | 0.034 | 0.647 (0.329-1.270) | 0.205 |
| ECOG | >=2/<2 | 1.686 (0.859-3.308) | 0.129 |  |  |
| MSKCC | Intermediate/Low | 0.767 (0.318-1.851) | 0.555 |  |  |
|  | High/Low | 1.329 (0.505-3.502) | 0.564 |  |  |
| PLR | High/Low | 0.760 (0.341-1.697) | 0.504 |  |  |
| NLR | High/Low | 3.175(1.559-6.470) | 0.001 | 2.057 (1.022-6.148) | 0.046 |
| MLR | High/Low | 2.215 (1.069-4.590) | 0.032 | 0.558 (0.171-1.823) | 0.334 |
| SII | High/Low | 1.275 (0.662-2.456) | 0.467 |  |  |
| PIV | High/Low | 3.141 (1.398-7.055) | 0.006 | 1.002 (0.308-3.257) | 0.998 |
| PILE | High/Low | 3.282 (1.792-6.010) | <0.001 | 2.972 (1.548-5.706) | 0.001 |

**Supplementary Table 4 The distribution of PIV among different groups**

| Characteristics | Category | N | Median PIV (IQR) | p-value |
| --- | --- | --- | --- | --- |
| Age | <65 | 66 | 287.35 (180.01-435.47) | 0.249 |
|  | >=65 | 43 | 225.02 (161.68-388.09) |  |
| Sex | Female | 55 | 263.00 (166.21-392.99) | 0.406 |
|  | Male | 54 | 278.40 (178.20-468.10) |  |
| Biopsy type | Stereotactic biopsy | 100 | 266.17(175.43-438.86) | 0.709 |
|  | Open biopsy  Surgical resection | 9 | 263.20 (144.60-329.60) |  |
| Hans | Non-GCB | 79 | 267.22 (175.31-418.33) | 0.976 |
|  | GCB | 30 | 264.06 (173.44-440.13) |  |
| Tumor Size | <5cm | 82 | 266.17 (165.35-435.47) | 0.663 |
|  | >=5cm | 27 | 259.64 (176.60-396.94) |  |
| Deep Lesions | Absent | 28 | 200.80 (145.10-340.30) | 0.100 |
|  | Present | 81 | 283.51 (179.46-443.88) |  |
| Number of Lesions | Single | 44 | 262.91 (177.26-394.71) | 0.578 |
|  | Multiple | 65 | 267.22 (171.33-473.28) |  |
| LDH (U/L) | Normal | 66 | 250.15 (159.32-389.28) | 0.321 |
|  | Elevated | 21 | 267.20 (182.80-387.60) |  |
| KPS | <70 | 27 | 275.32 (180.22-740.11) | 0.077 |
|  | >=70 | 82 | 263.10 (172.27-387.13) |  |
| ECOG | <2 | 29 | 265.12 (159.19-318.45) | 0.282 |
|  | >=2 | 80 | 265.21 (177.26-446.00) |  |
| MSKCC | Low | 11 | 205.18 (144.38-260.75) | 0.154 |
|  | Intermediate | 73 | 282.34 (176.06-390.84) |  |
|  | High | 25 | 275.32 (177.66-738.50) |  |
| Treatment Evaluation | CR | 63 | 259.64 (173.20-356.66) | 0.107 |
|  | PR | 9 | 179.77 (81.82-365.45) |  |
|  | SD | 4 | 246.10 (166.00-664.20) |  |
|  | PD | 33 | 385.71 (187.17-477.56) |  |
| Response | Non-responders | 37 | 372.46 (182.79-477.56) | 0.030 |
|  | Responders | 72 | 240.02 (167.67-370.03) |  |
| Primary Resistance | No | 76 | 240.02 (167.67-370.03) | 0.025 |
|  | Yes | 33 | 385.71 (187.17-477.56) |  |


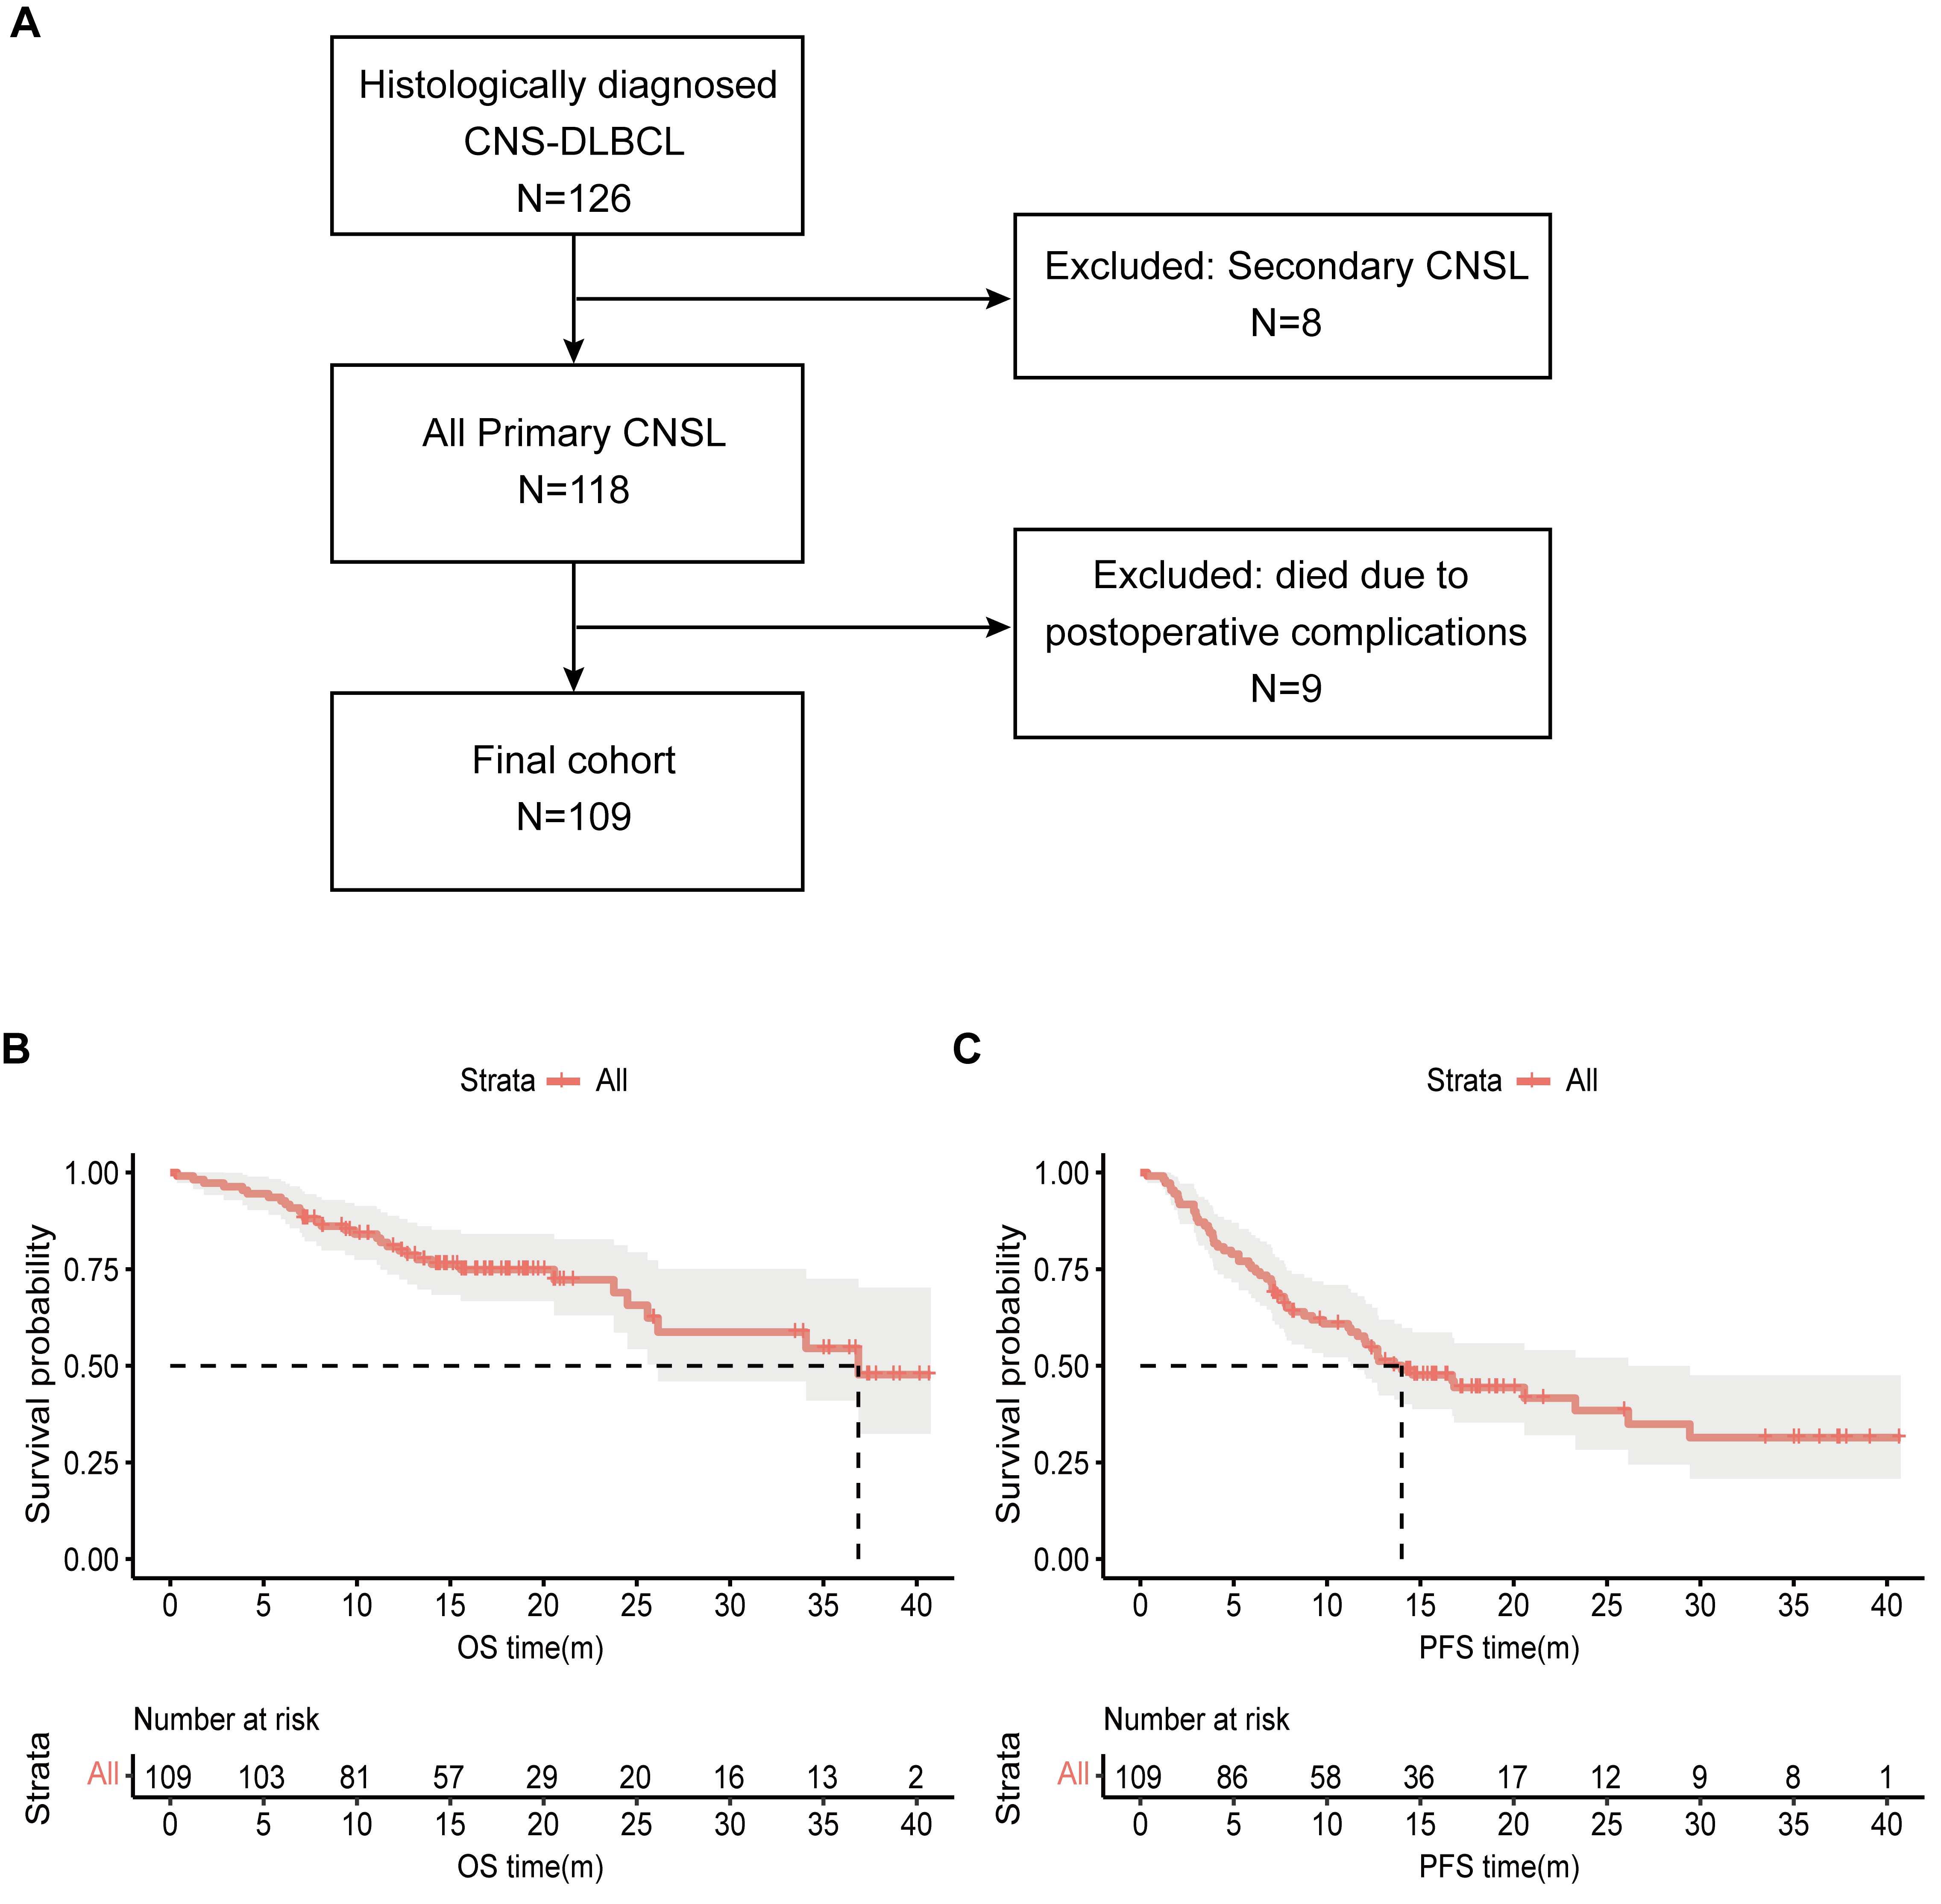


**Supplementary Figure 1 The flowchart and survival analysis of the entire cohort. A.** The flowchart of patient inclusion and exclusion. **B.** The Kaplan-Meier curves of overall survival (OS) of the entire cohort. **C.** The Kaplan-Meier curves of progression-free survival (PFS) of the entire cohort.


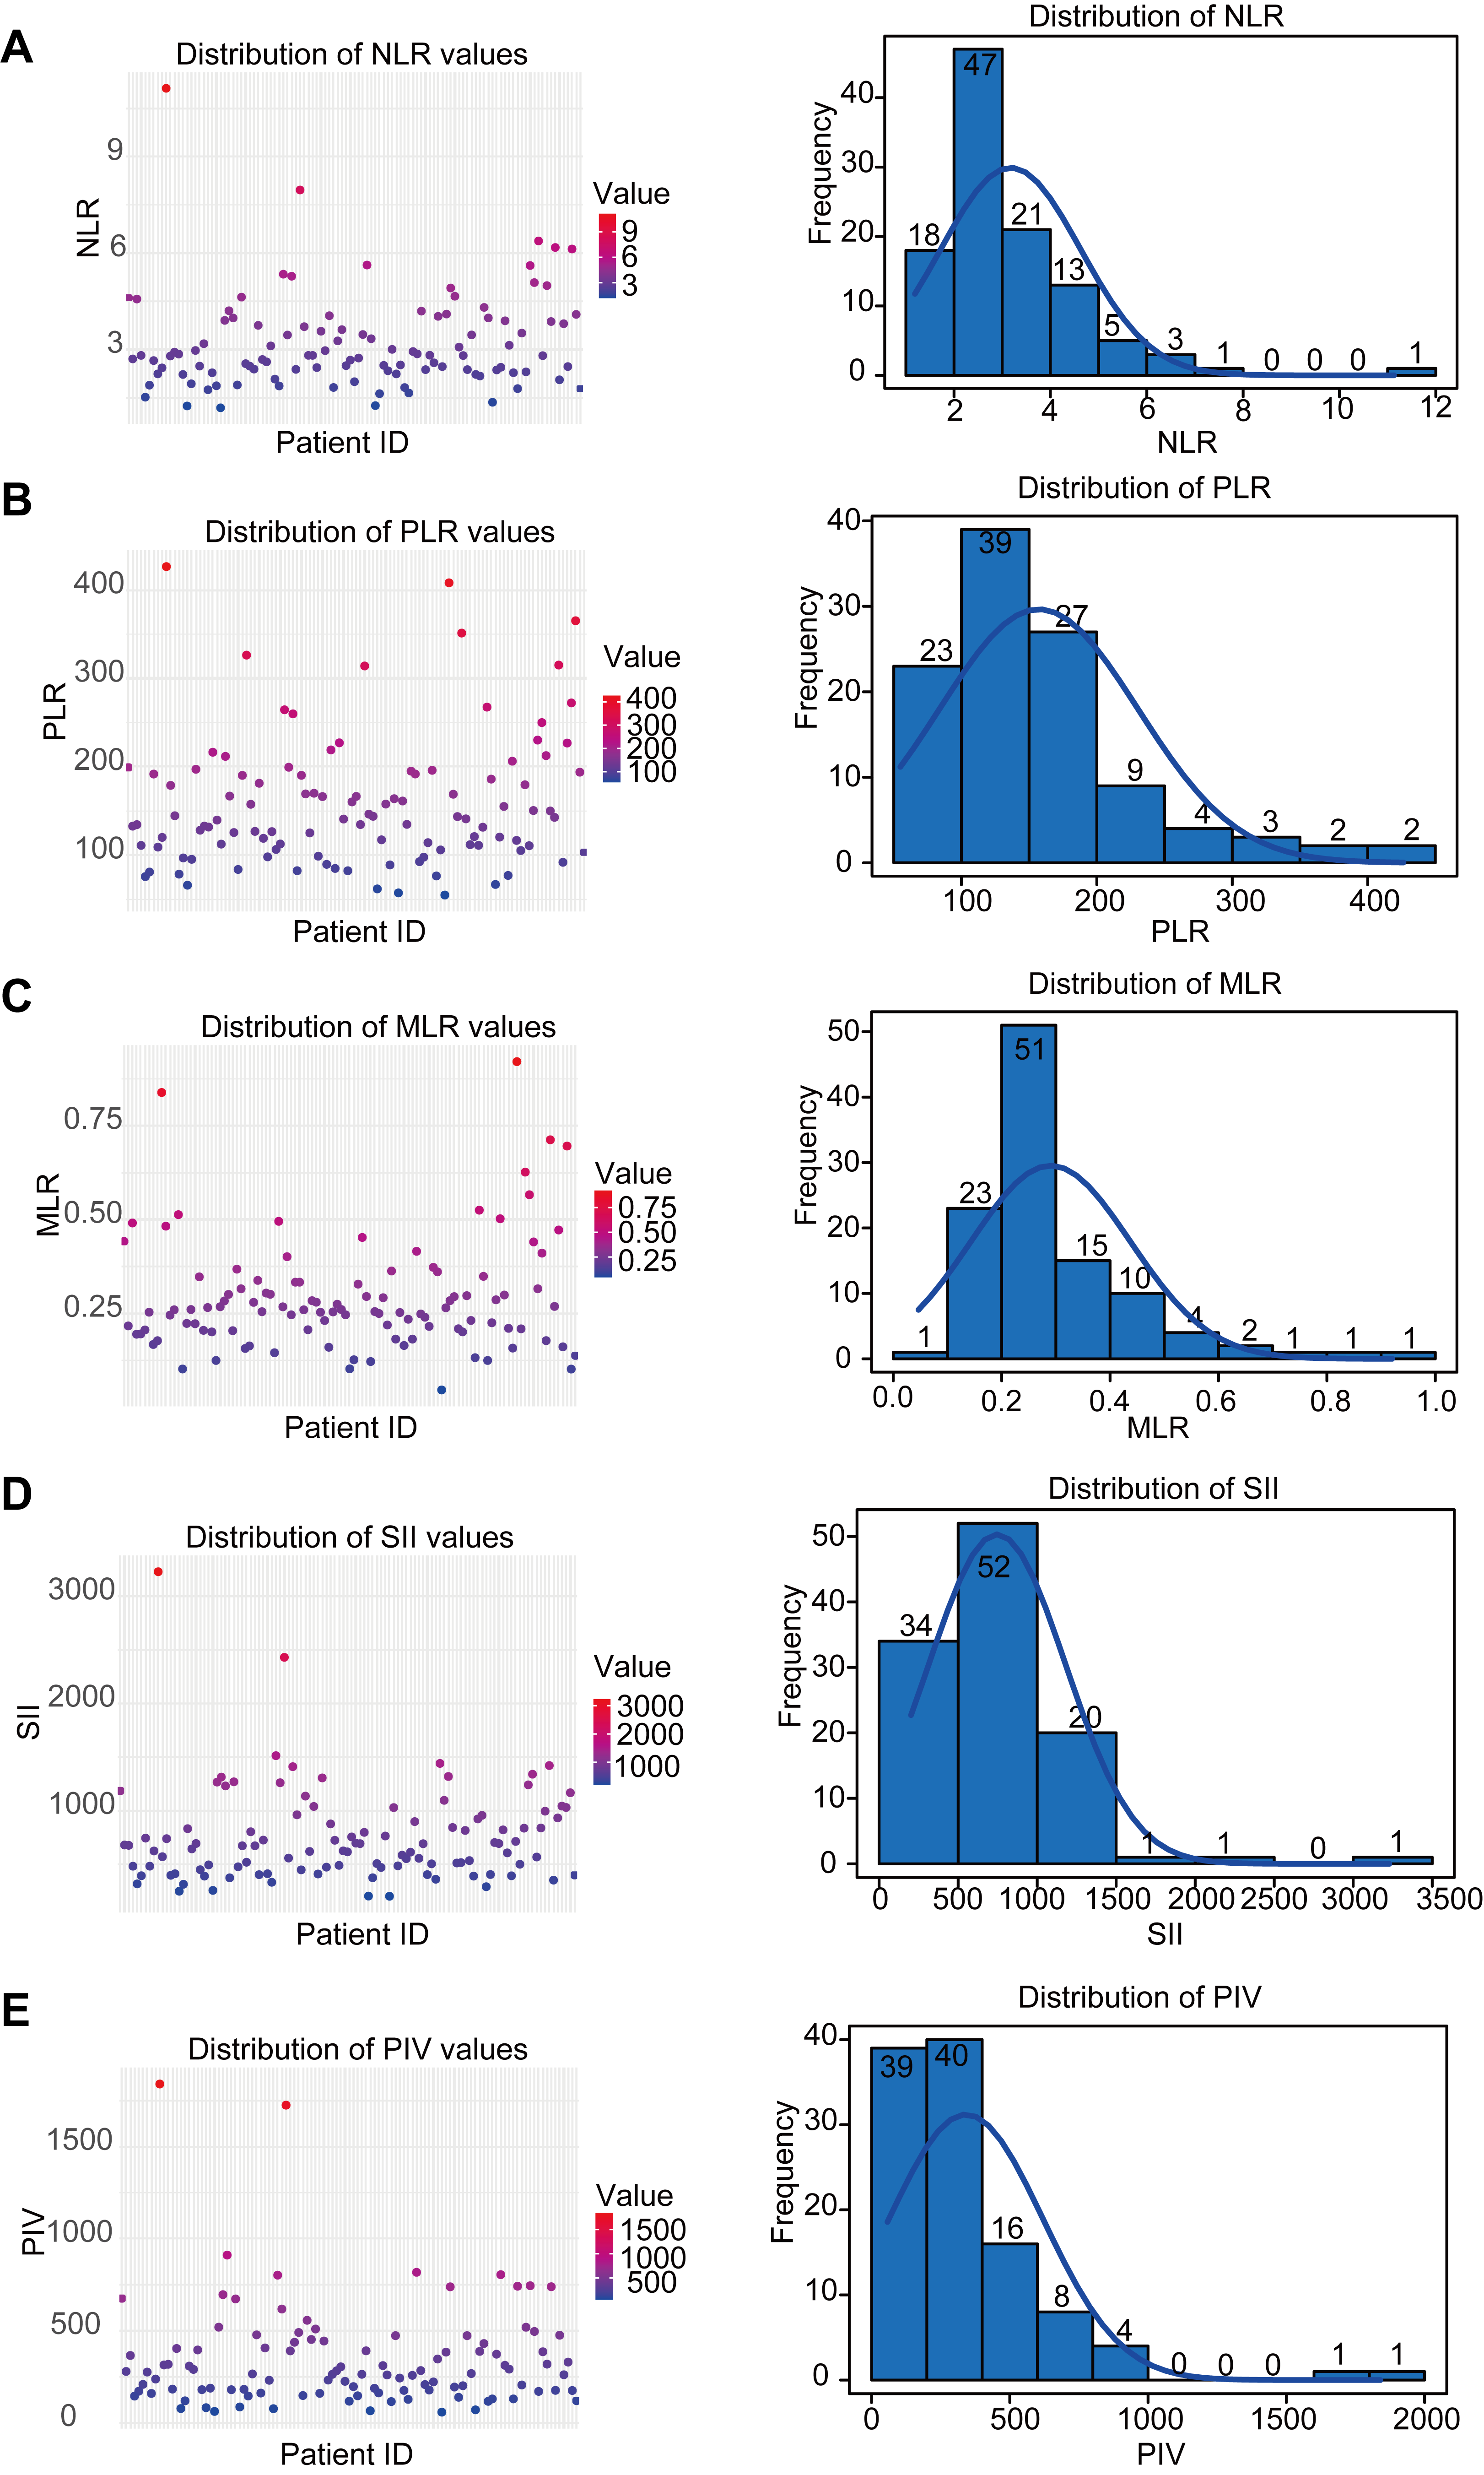


**Supplementary Figure 2 The distribution of inflammation parameters.** The dot plot and histogram of NLR (**A**), PLR (**B**), MLR (**C**), SII (**D**), and PIV (**E**).


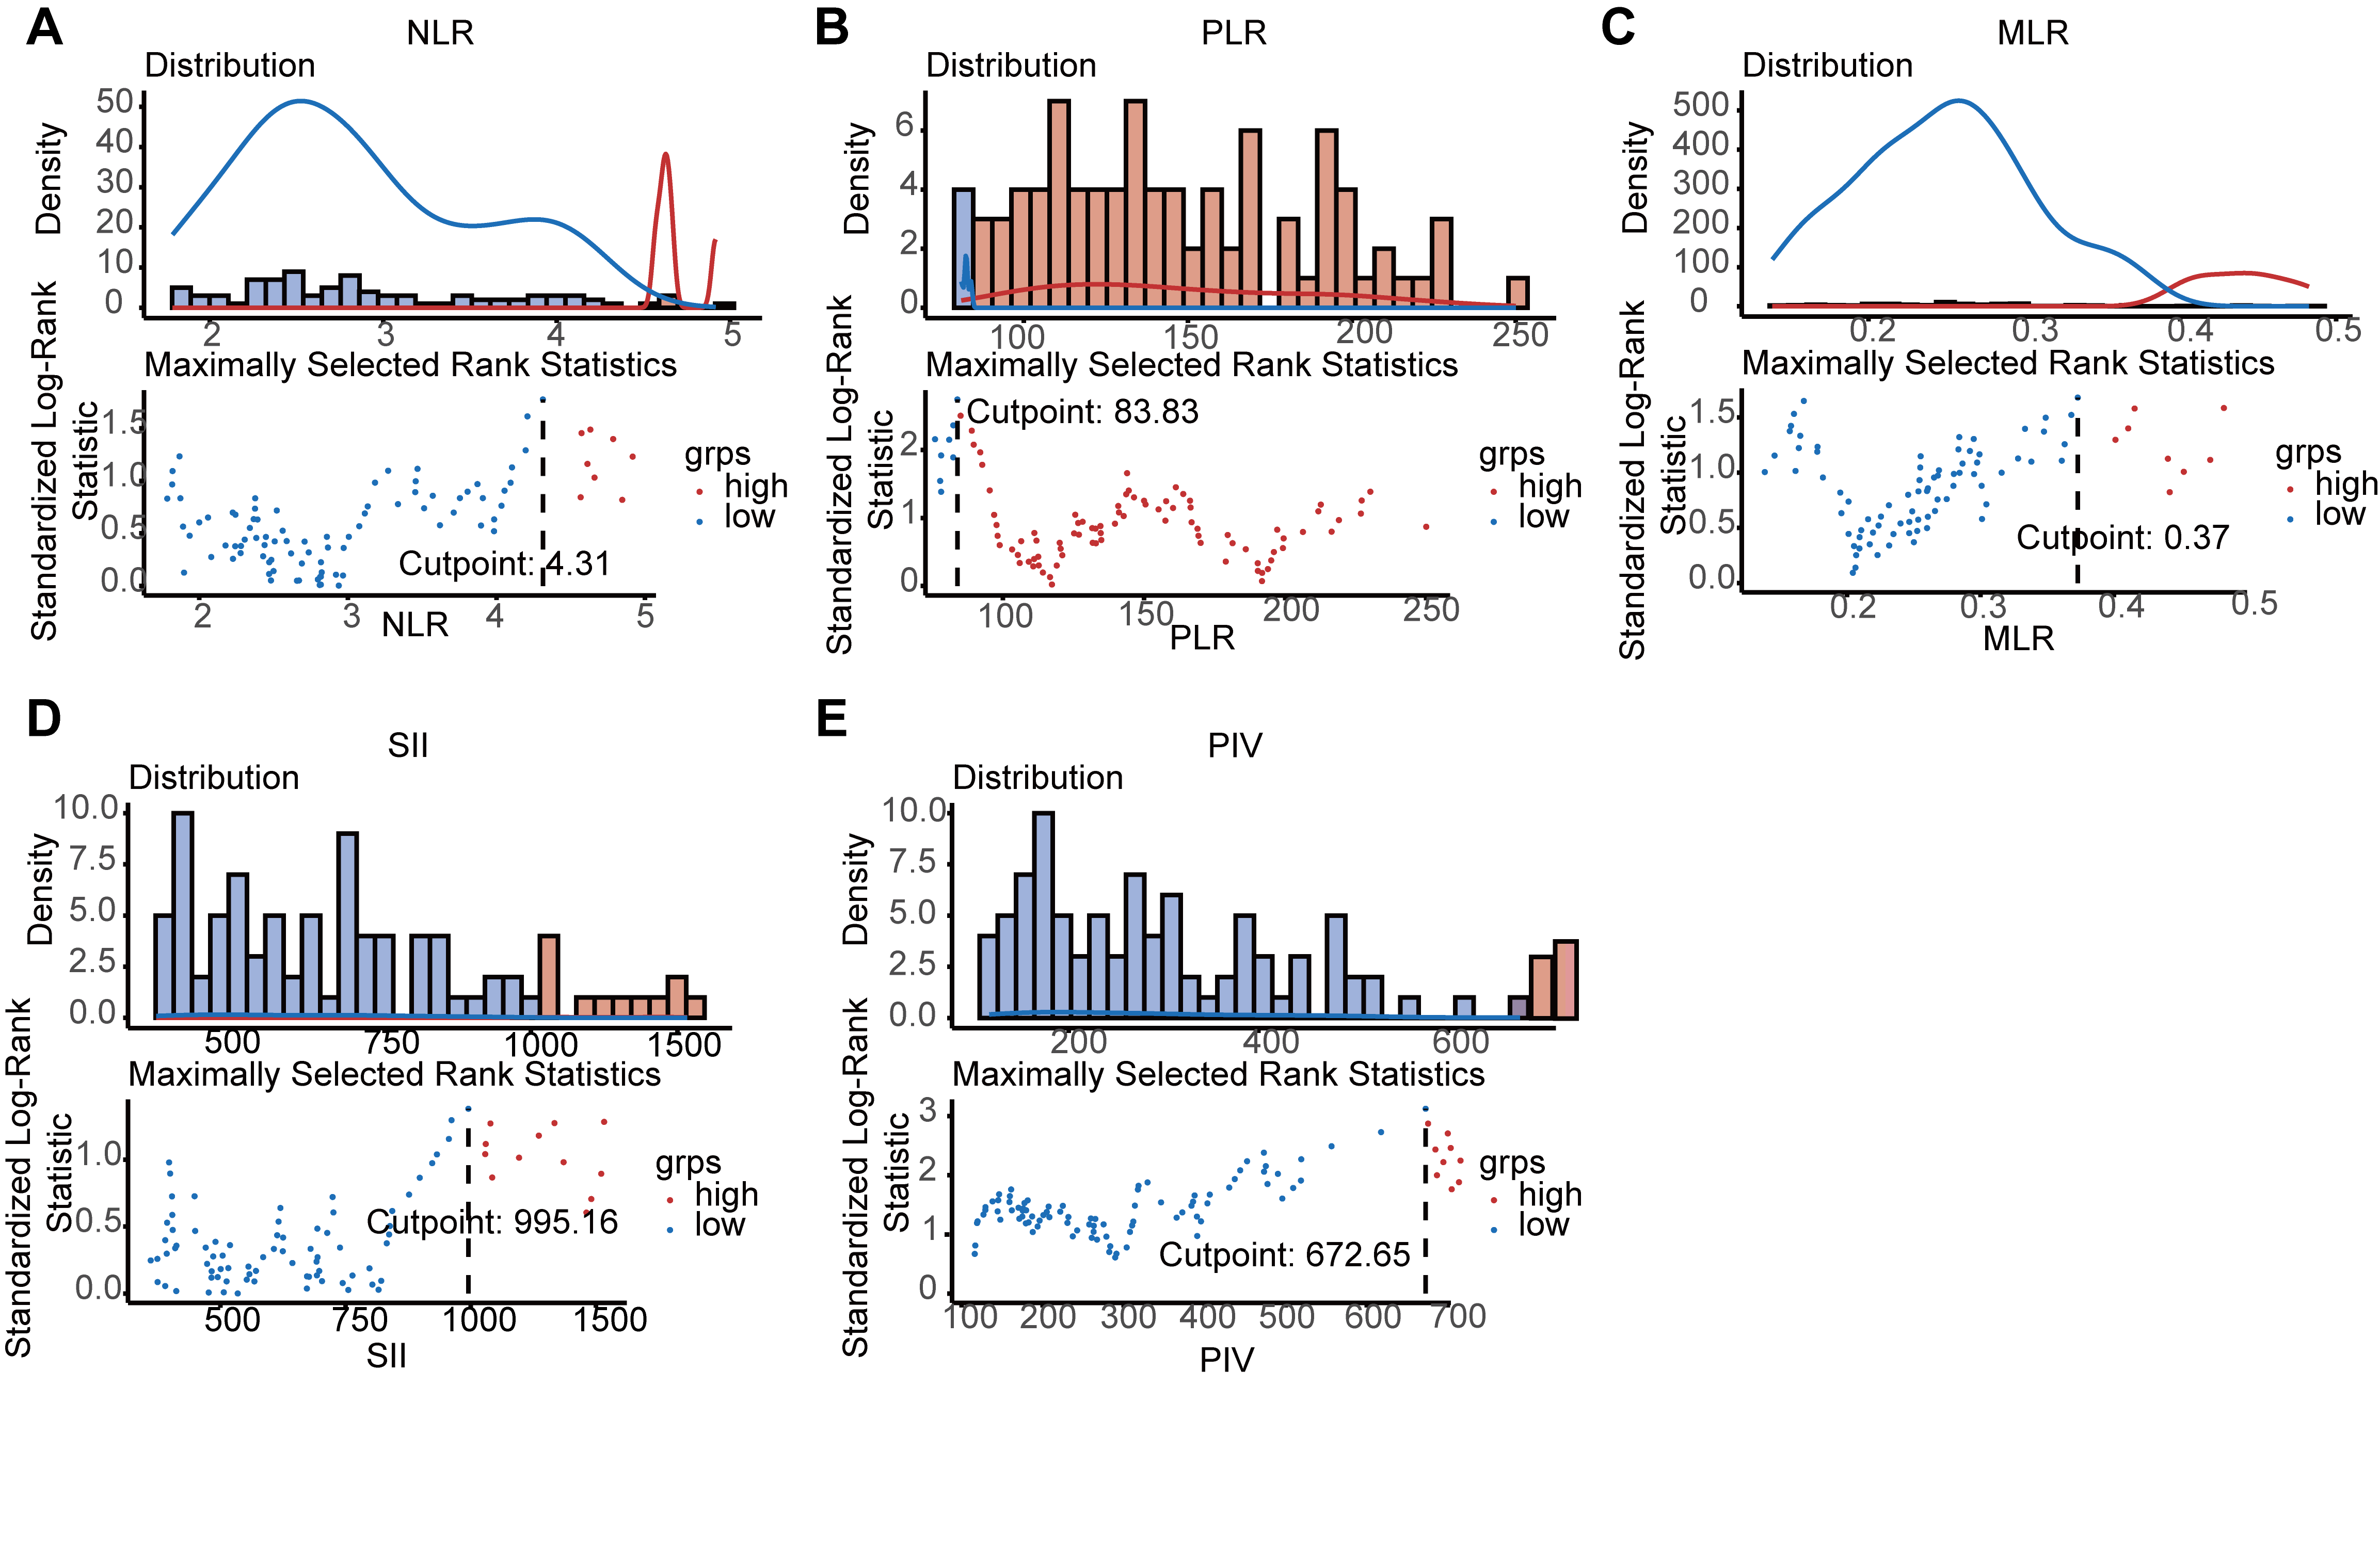


**Supplementary Figure 3 Selection of the optimum cutoff value for inflammation parameters value.** Histogram showing the density distribution for high- and low-groups divided by the optimum cutoff value. Scatter plot showing the standardized log-rank statistic value for each cutoff value.The best cut-off values for NLR (**A**), PLR (**B**), MLR (**C**), SII (**D**), and PIV (**E**) were 4.31, 83.83, 0.37, 995.16, and 672.65, respectively.


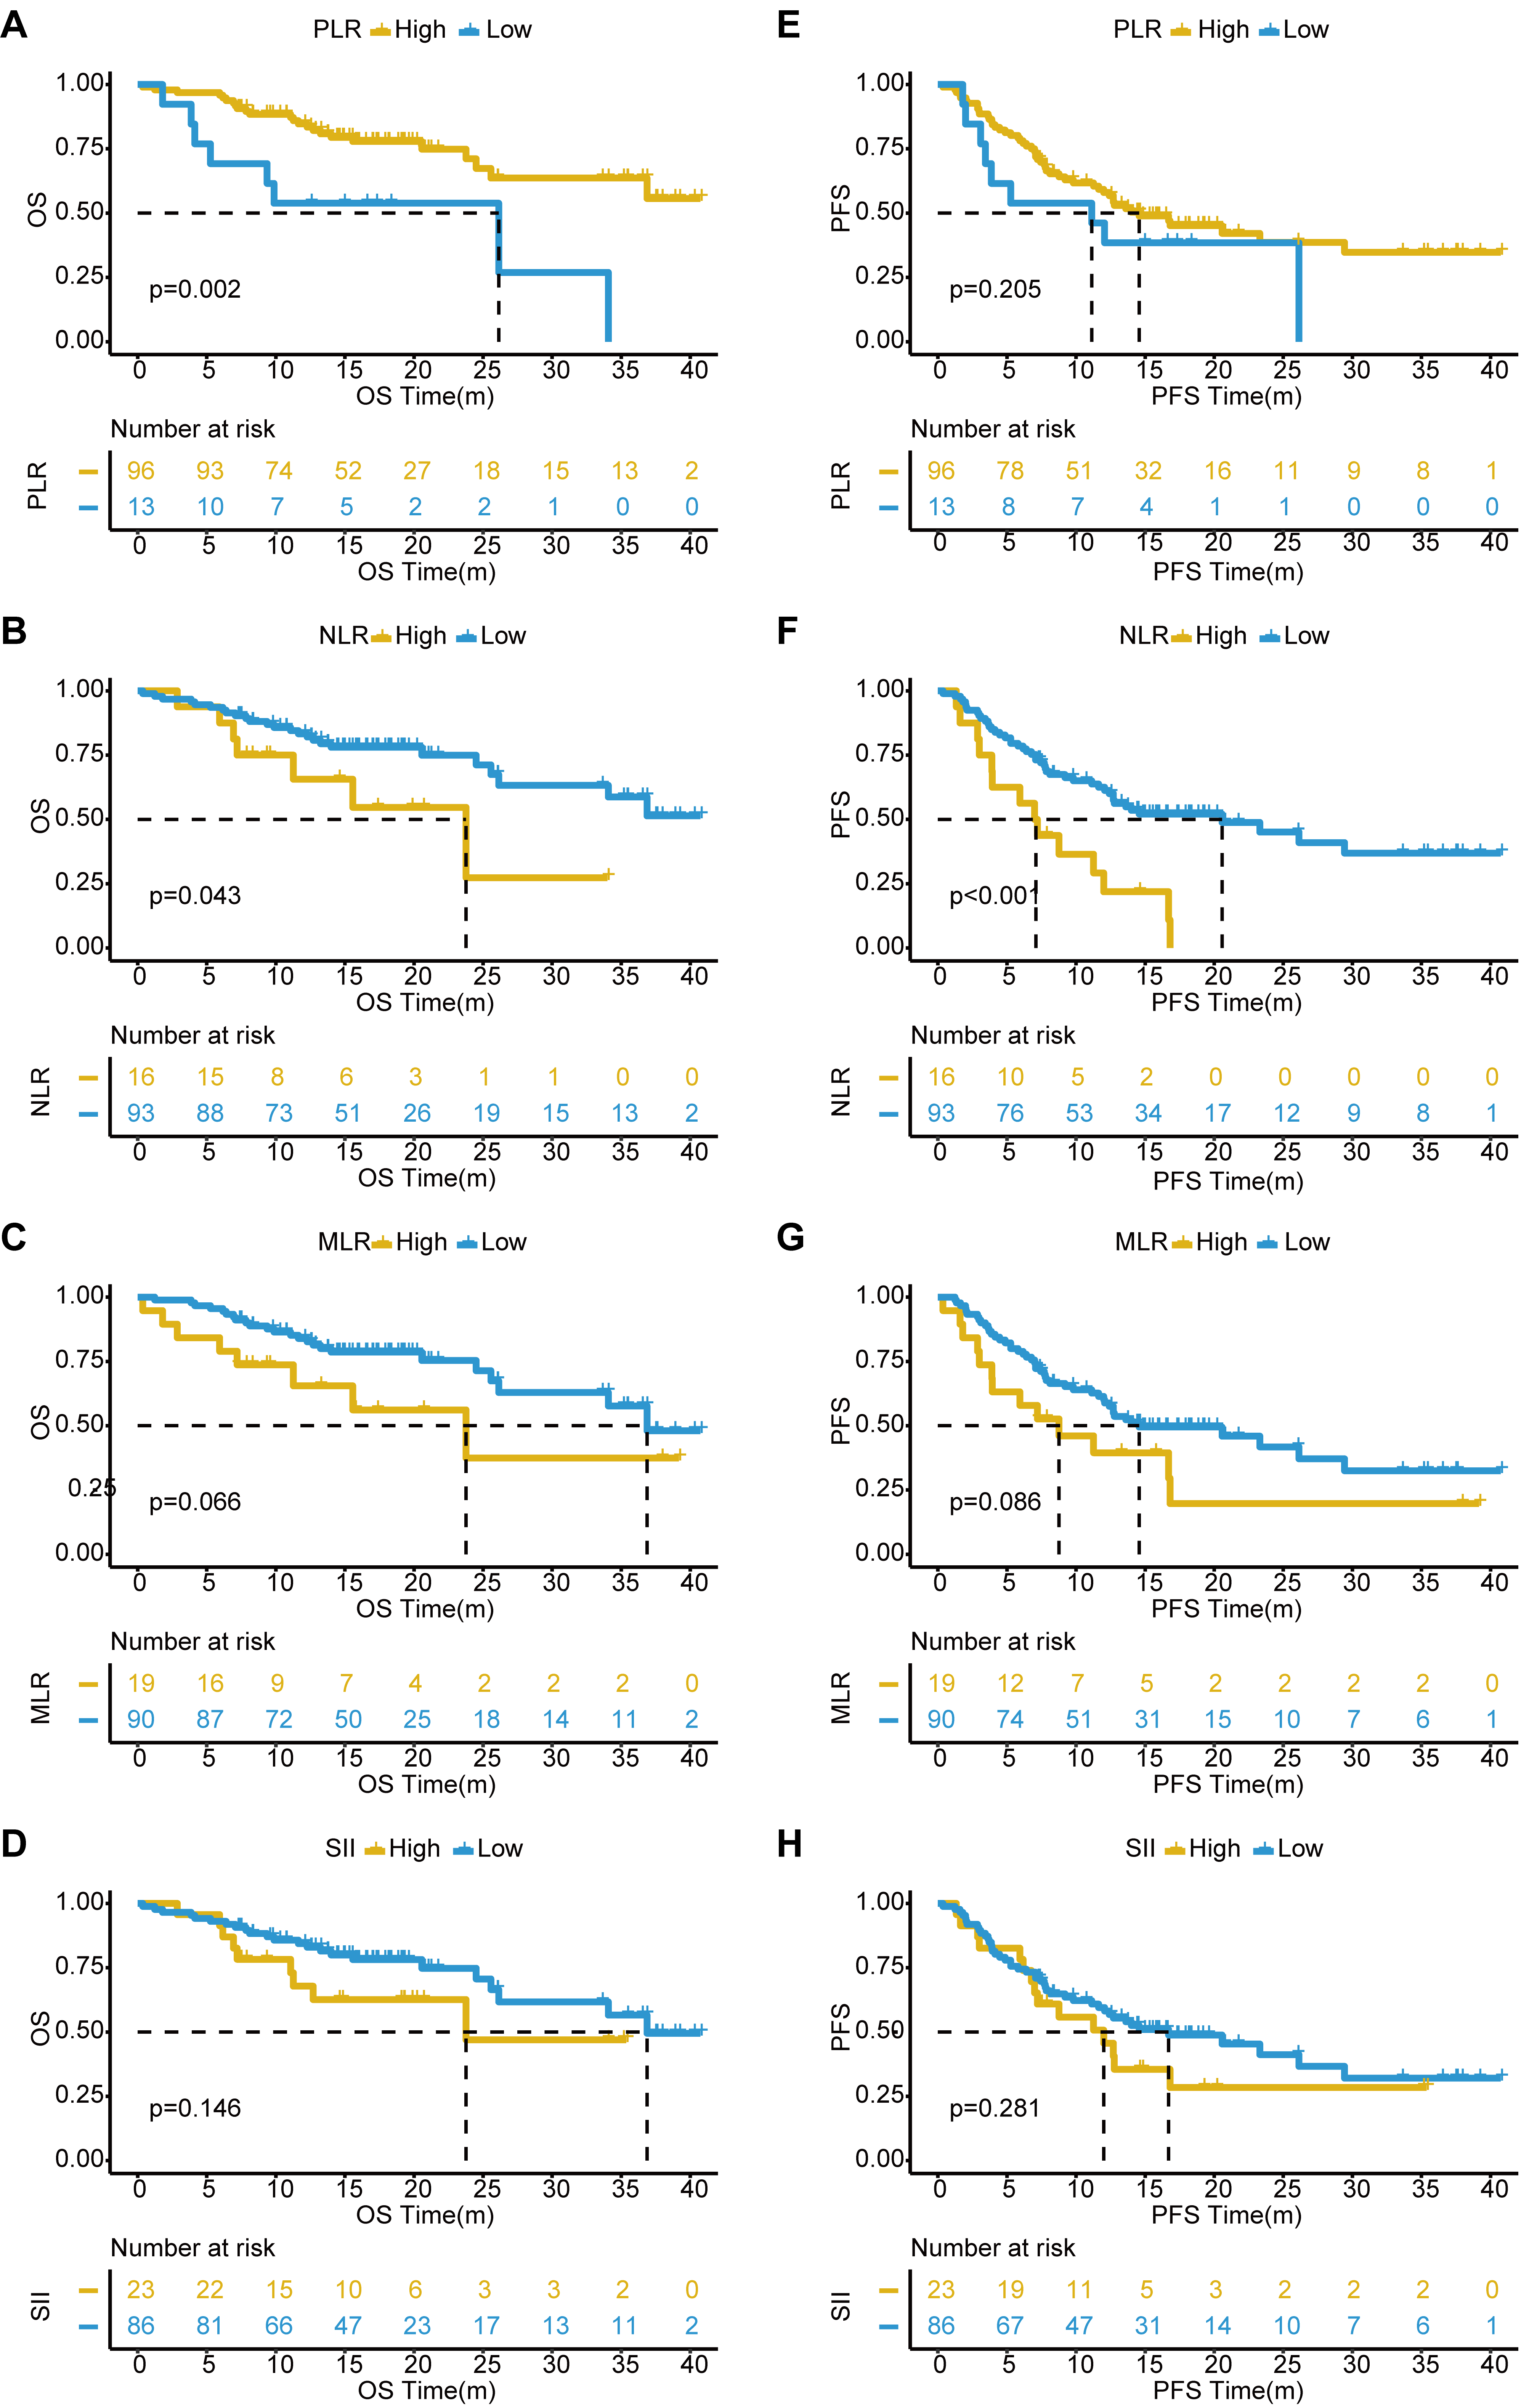


**Supplementary Figure 4 Survival analyses according to baseline PLR, NLR, MLR, and SII values.** Kaplan-Meier curves of overall survival (OS) and progression-free survival (PFS) according to baseline PLR (**A, E**), NLR (**B, F**), MLR (**C, G**), and SII (**D, H**) categories.


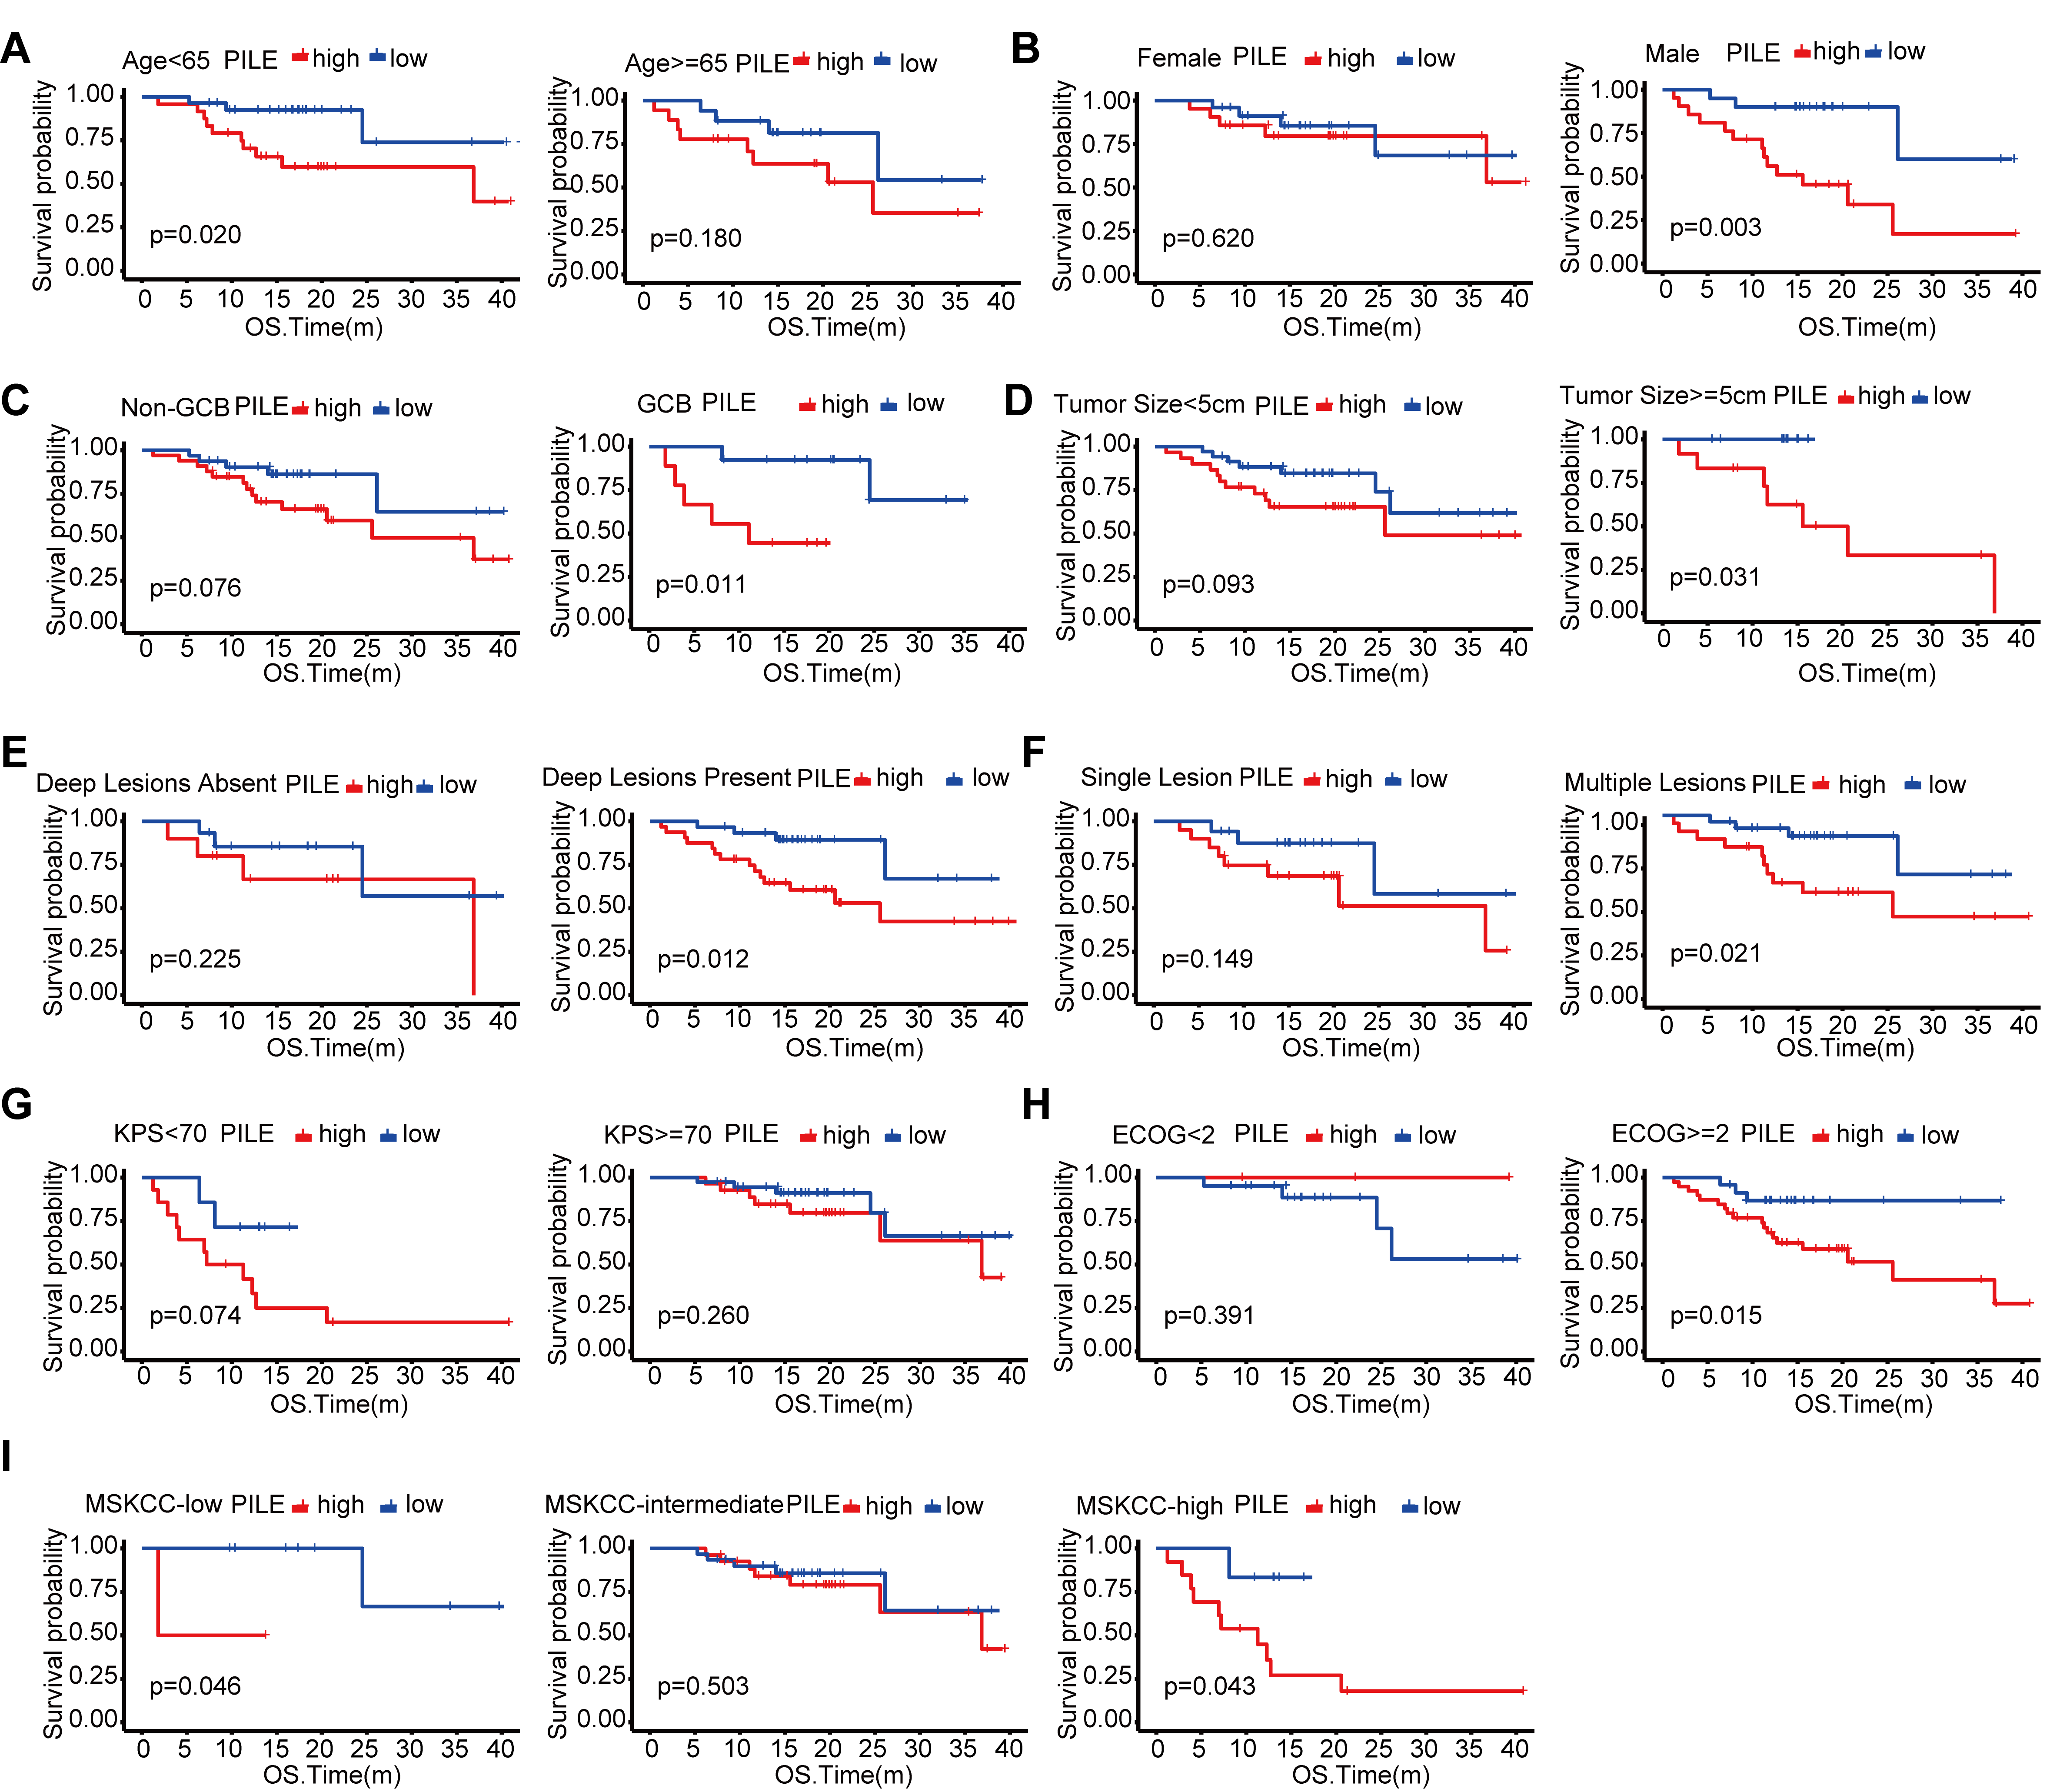


**Supplementary Figure 5 Kaplan-Meier survival analysis of the overall survival of patients according to the PILE group stratified by clinicopathological variables.** The comparisons between the two groups are performed using a two-sided log-rank test. **A**. Age (<65/>=65). **B**. Sex (Female/Male). **C**. Hans subtype (Non-GCB/GCB). **D**. Tumor Size (<5cm/>=5cm). **E**. Deep Lesions (Absent/Present). **F**. Number of lesions (Single/Multiple). **G**. KPS (<70/>=70). **H**. ECOG (<2/>=2). **I**. MSKCC (low/intermediate/high).


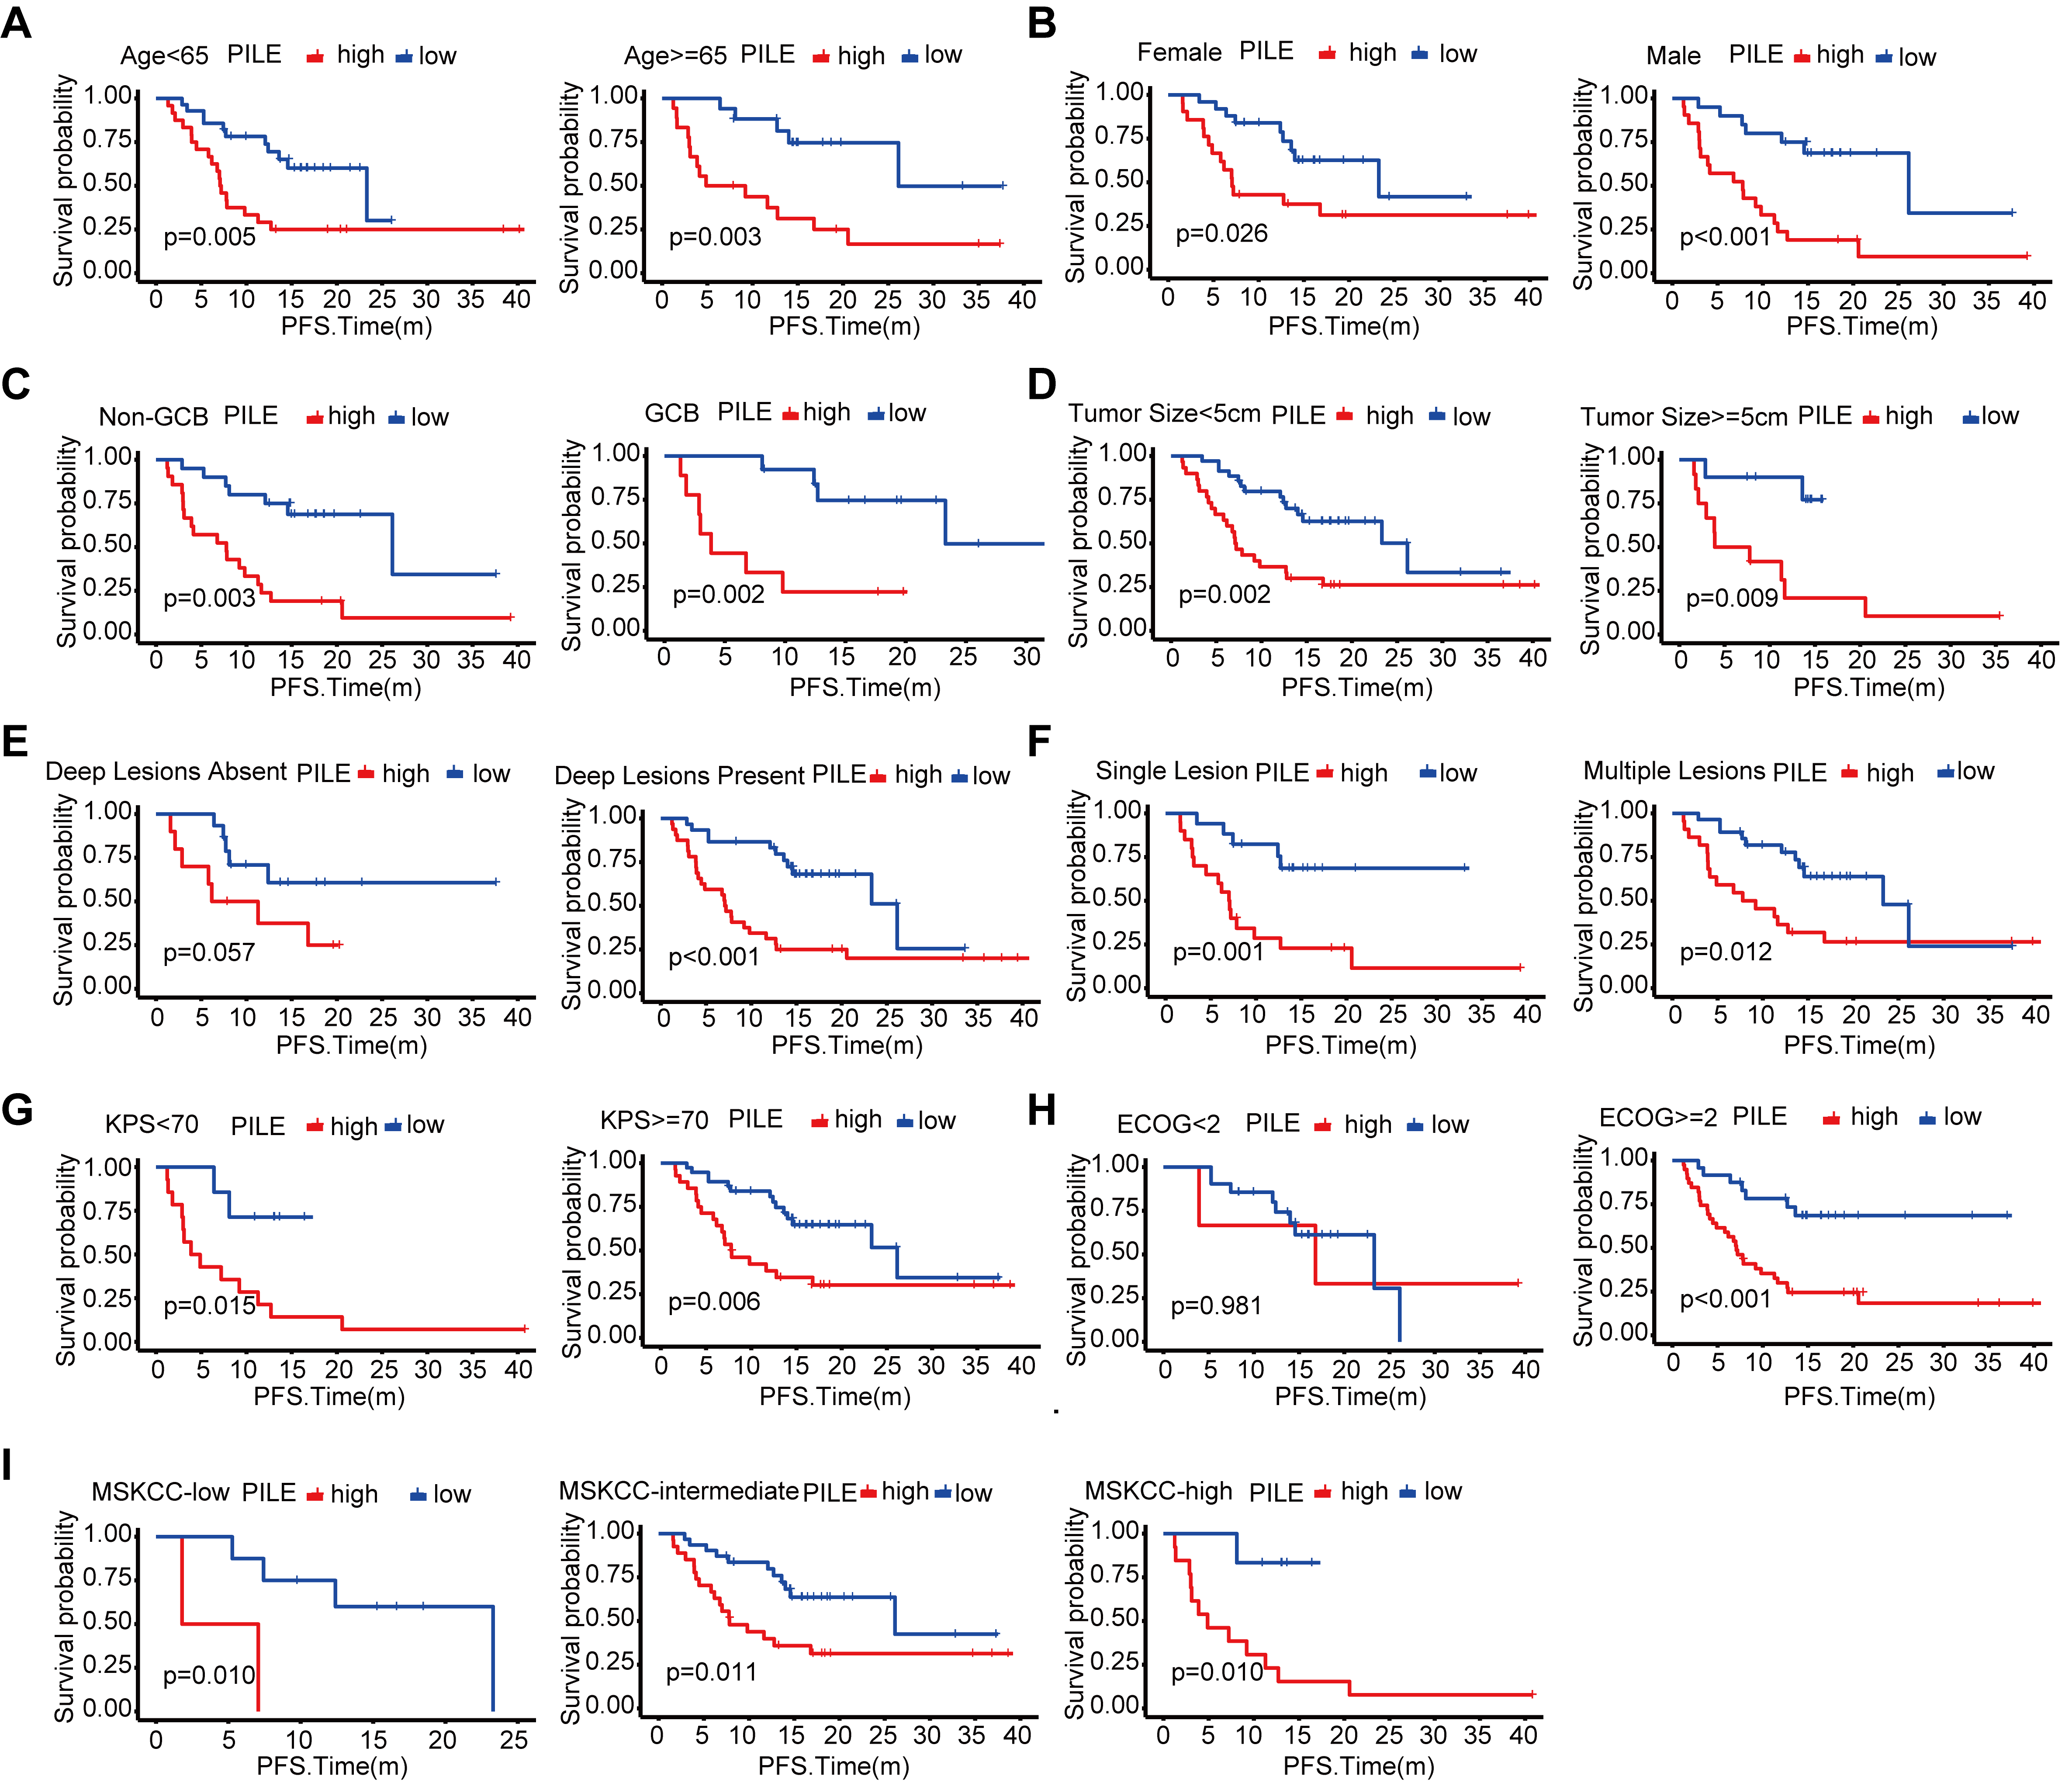


**Supplementary Figure 6 Kaplan-Meier survival analysis of the progression-free survival of patients according to the PILE group stratified by clinicopathological variables.** The comparisons between the two groups are performed using a two-sided log-rank test. **A**. Age (<65/>=65). **B**. Sex (Female/Male). **C**. Hans subtype (Non-GCB/GCB). **D**. Tumor Size (<5cm/>=5cm). **E**. Deep Lesions (Absent/Present). **F**. Number of lesions (Single/Multiple). **G**. KPS (<70/>=70). **H**. ECOG (<2/>=2). **I**. MSKCC (low/intermediate/high).


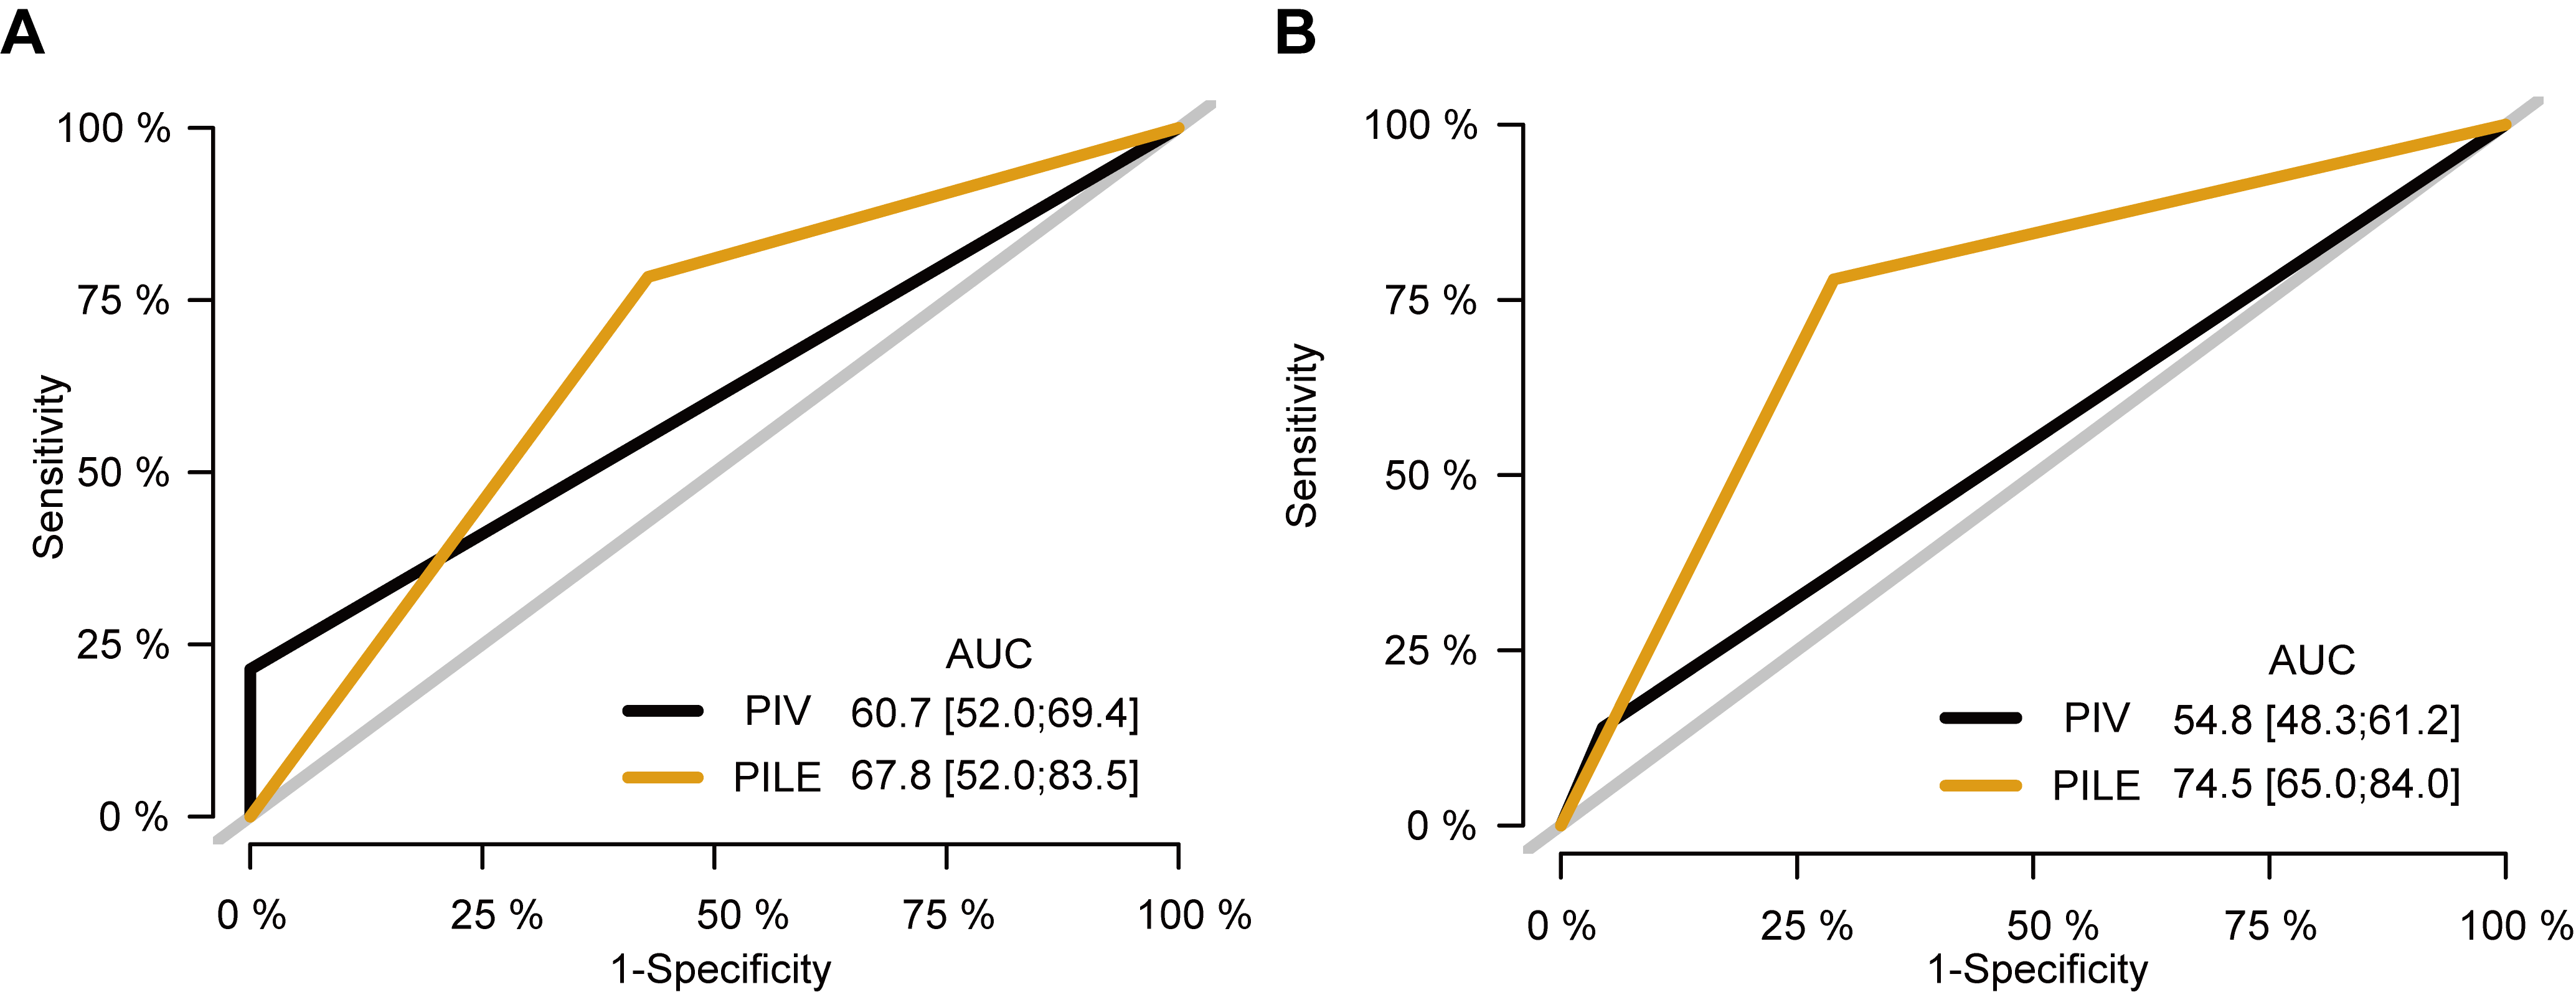


**Supplementary Figure 7 The Receiver Operating Characteristic Curve (ROC) curves for the overall survival (A) and progression-free survival (B) of PILE and PIV.**
